# Supplementary material for: Efficient solar cells are more stable: the impact of polymer molecular weight on performance of organic photovoltaics
Source: Royal Society of Chemistry journal article supplement (doi:10.1039/c6ta00721j), 2016-01-01

## Supporting Information

### **Efficient solar cells are more stable: Improved efficiency and lifetime of organic photovoltaics by control of polymer molecular weight**

Z. Ding,<sup>1</sup> J. Kettle\*,<sup>1</sup> M. Horie,<sup>2</sup> S.W. Chang,<sup>2</sup> G.C. Smith,<sup>3</sup> A. I. Shames<sup>4</sup> and E. A. Katz<sup>5,6</sup>

<sup>1</sup>*School of Electronics, Bangor University, Dean St, Bangor, Gwynedd, LL57 1UT, Wales, UK \*Contact details; Tel: +44 (0) 1248 382471; E-mail: j.kettle@bangor.ac.uk*

<sup>2</sup>*Department of Chemical Engineering, National Tsing Hua University, 101, Sec. 2, Kuang-Fu Road, Hsinchu, Hsinchu City 30013, Taiwan*

<sup>3</sup>*Department of Natural Sciences, University of Chester, Thornton Science Park, Chester CH2 4NU, UK*

<sup>4</sup>*Department of Physics, Ben-Gurion University of the Negev, P.O.B. 653, 8410501, Be'er-Sheva, Israel*

<sup>5</sup>*Department of Solar Energy and Environmental Physics, J. Blaustein Institutes for Desert Research, Ben-Gurion University of the Negev, Sede Boker Campus, 84990, Israel*

<sup>6</sup>*Ilse Katz Institute of Nano-Science and Technology, Ben-Gurion University of the Negev, Be'er Sheva 84105, Israel*

**Figure S1.** GPC elution curves. The measurements were carried out using THF as the solvent and calibrated by polystyrene standards.

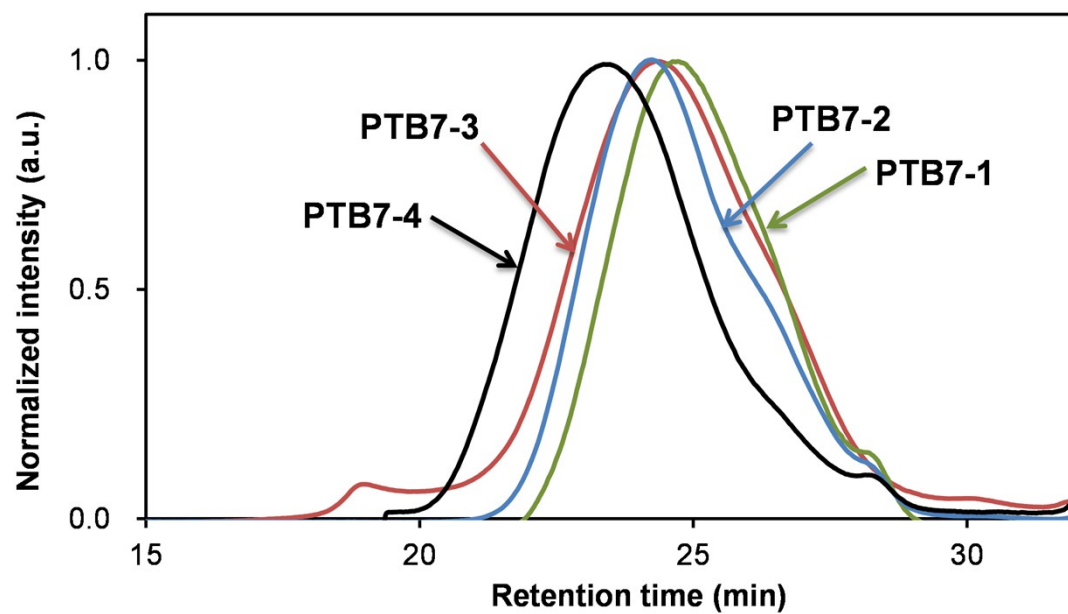

**Figure S2.** UV-vis spectra of PTB7 in (a) THF solutions and (b) thin films cast from 20mg/mL by spin-coating at the same spin speed.

(a) In THF

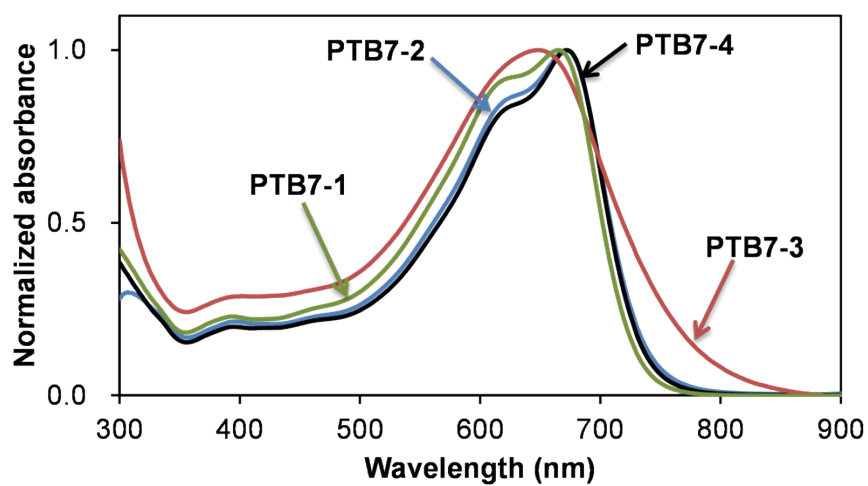

(b) In film

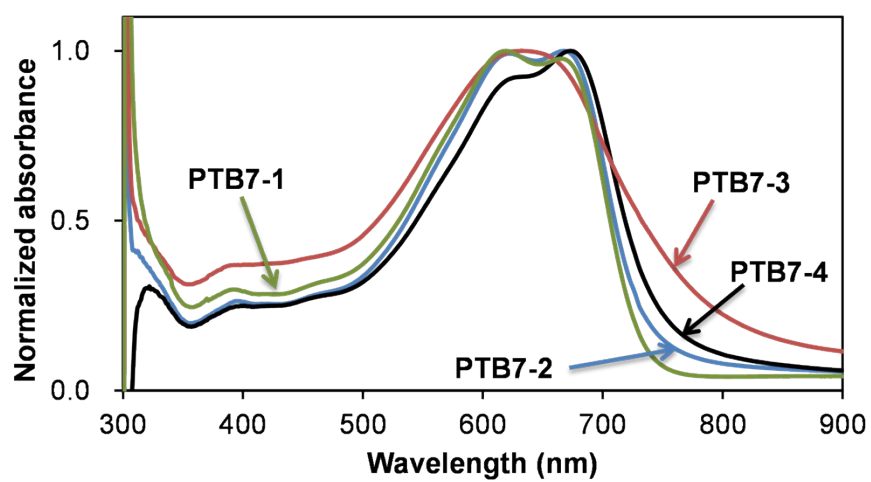

**Figure S3.** Cyclic voltammograms of **PTB7-1 - 4** on Pt plate in MeCN solution containing 0.1 M *n*-Bu<sub>4</sub>NPF<sub>6</sub>. Scan rate = 0.10 V/s.

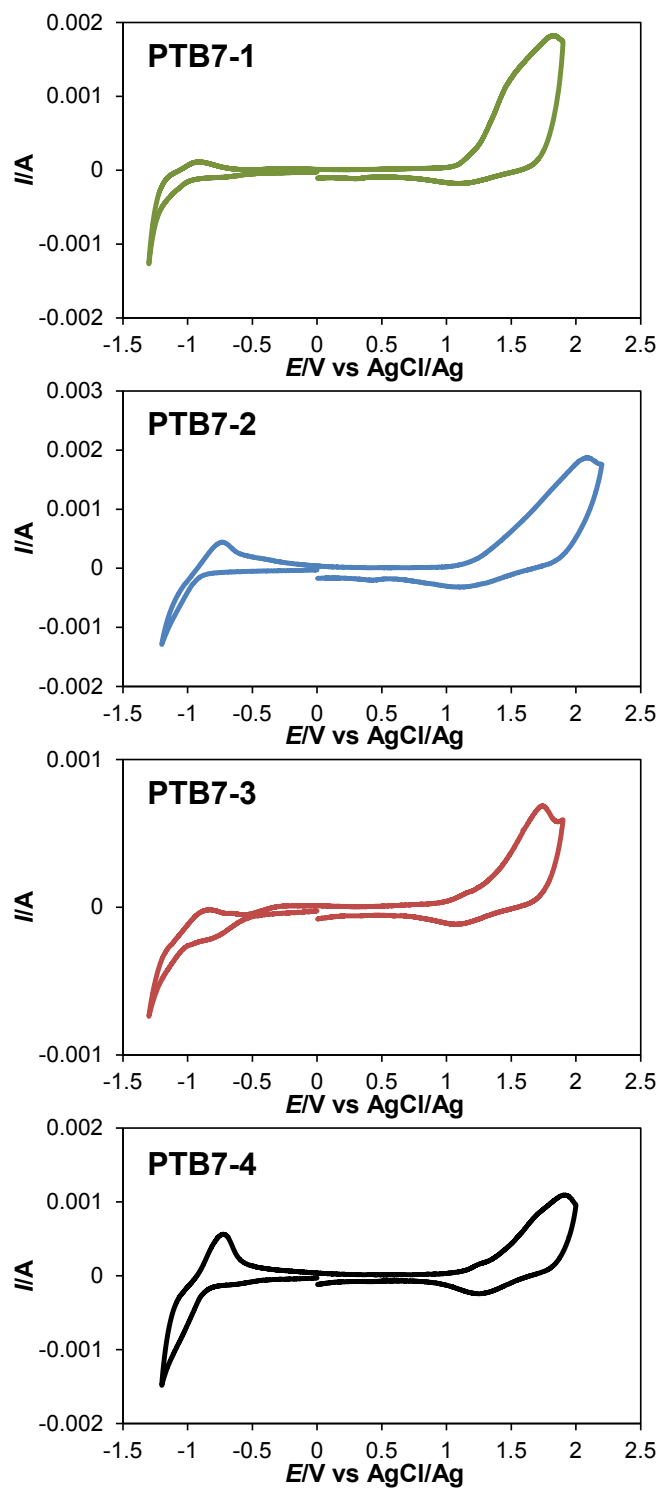

**Figure S4.** Experimental (black trace) and simulated (red trace) X-band EPR spectra of positive polarons in PTB7-1 powder. Spin-Hamiltonian parameters used for simulation:  $g_1 = 2.0068$ ,  $g_2 = 2.0038$ ,  $g_3 = 2.0026$ ,  $a_1 = a_2 < 0.06$  mT and  $a_3 = 0.36$  mT, Lorentzian shape of individual lines,  $\Delta H_{pp1} = \Delta H_{pp2} = 0.06$  mT,  $\Delta H_{pp3} = 0.18$  mT.

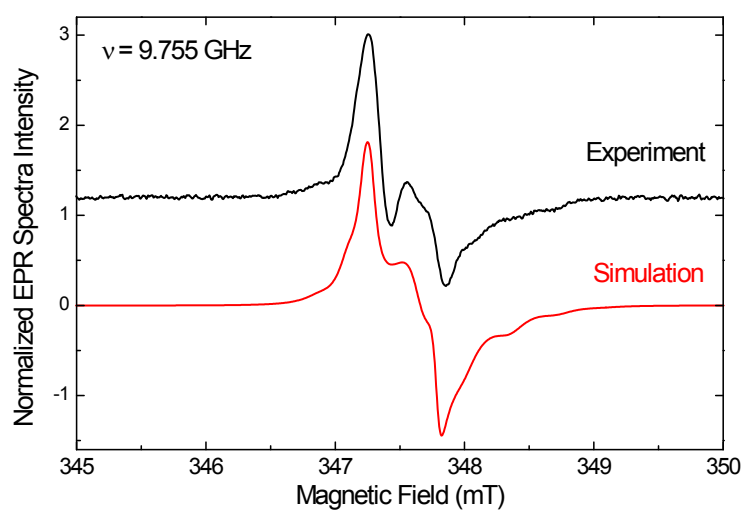

Supplement: c6ta00721j1.pdf [file c6ta00721j1.pdf]
